# Supplementary material for: The electrocatalytic characterization and mechanism of carbon nanotubes with different numbers of walls for the VO2+/VO2+ redox couple
Source: Royal Society of Chemistry journal article supplement (doi:10.1039/c7cp08683k), 2018-01-01
Supplement: c7cp08683k1.pdf [file c7cp08683k1.pdf]

## Supplementary Information

### The Electrocatalytic Characterization and Mechanism of Carbon Nanotubes with Different Number of Walls for the $\text{VO}_2^+/\text{VO}^{2+}$ Redox Couple

Zhaoqian Lv<sup>¶,a</sup>, Jin Zhang<sup>¶,a</sup>, Yang Lv<sup>a</sup>, Yi Cheng<sup>b</sup>, San Ping Jiang<sup>b</sup>, Yan Xiang<sup>a</sup>, Shanfu Lu<sup>a,\*</sup>

<sup>¶</sup> This two authors contribute equally.

<sup>a</sup> Beijing Key Laboratory of Bio-inspired Materials and Devices & School of Space  
and Environment, Beihang University, Beijing, 100191, China

<sup>b</sup> Fuels and Energy Technology Institute & Department of Chemical Engineering,  
Curtin University, Perth, WA6102, Australia

**Table S1** Metal impurities in as-received carbon nanotubes (CNTs) and purified CNTs by ICP-OES analysis.

| CNTs                |     | CNTs-1 | CNTs-2 | CNTs-3 | CNTs-4 | CNTs-5 |
|---------------------|-----|--------|--------|--------|--------|--------|
| As received<br>W/W% | Ash | 1.56   | 5.2    | 5.16   | 2.16   | 2.31   |
|                     | Co  | 0.08   | 2.02   | 0.5    | -      | -      |
|                     | Fe  | 0.43   | 2.06   | 0.35   | 0.28   | 0.54   |
|                     | Mo  | 0.04   | 0.73   | 0.11   | -      | 0.84   |
|                     | Ni  | 0.08   | 0.04   | 0.019  | 0.25   | 0.21   |
| Purified<br>W/W%    | Ash | 1.21   | 2.15   | 2.28   | 2.08   | 1.83   |
|                     | Co  | 0.07   | 0.57   | 0.38   | -      | -      |
|                     | Fe  | 0.29   | 0.23   | 0.17   | 0.21   | 0.29   |
|                     | Mo  | 0.03   | 0.27   | 0.09   | 0.01   | 0.49   |
|                     | Ni  | 0.05   | 0.03   | 0.015  | 0.2    | 0.17   |

100 CNTs were randomly selected from TEM images for each CNTs category and the measured number of walls and diameter were listed in Table S1. The average value ( $\bar{n}$ ) and the standard deviation ( $s_1$ ) of wall number and average outer diameter ( $\bar{OD}$ ) and the standard deviation ( $s_2$ ) of each CNTs category were calculated from the measured data. More specifically, the results of mathematical statistics indicate that the proportion of single walled CNT in CNTs-1 is up to 79%, whilst the proportion of double walled CNT and triple walled CNT is 16% and 5%, respectively. For CNTs-1, the average wall number ( $\bar{n}$ ) is 1.26 and the standard deviation( $s_1$ ) of the data is 0.54.

$$C.I. = \bar{n} \pm t \cdot s \quad \text{Equation 1}$$

To describe the distribution of wall number thoroughly, the confidence interval (C.I.) should be taken into consideration. The value of  $t$  in Equation 1 is applied to specify the degree of certainty of the result. Confidence level of 95% is typically used in chemical analysis and the value of  $t$  is 1.96 when the number of data is 100. It is calculated that the interval is  $1.26 \pm 1.06$  for CNTs-1 and can precisely describe the

distribution of wall number in this sample. The distributions of wall number and outer diameter for each CNTs category are shown in Table S2.

**Table S2** The detailed information on wall numbers( $n$ ), average wall numbers( $\bar{n}$ ) and the standard deviation( $s_1$ ), average outer diameter ( $\bar{OD}$ ) and standard deviation( $s_2$ ) of the five CNTs samples.

| Catalysts                                | CNTs-1          | CNTs-2          | CNTs-3          | CNTs-4           | CNTs-5           |
|------------------------------------------|-----------------|-----------------|-----------------|------------------|------------------|
| Wall Number<br>( $n$ ) and<br>Proportion |                 |                 |                 |                  | 26 (5%)          |
|                                          |                 |                 |                 |                  | 27 (4%)          |
|                                          |                 |                 |                 | 8 (3%)           | 28 (8%)          |
|                                          |                 |                 | 3 (5%)          | 9 (6%)           | 29 (12%)         |
|                                          |                 |                 | 4 (8%)          | 10 (9%)          | 30 (15%)         |
|                                          | 1 (79%)         | 2 (25%)         | 5 (11%)         | 11 (14%)         | 31 (11%)         |
|                                          | 2 (15%)         | 3 (52%)         | 6 (11%)         | 12 (26%)         | 32 (8%)          |
|                                          | 3 (6%)          | 4 (14%)         | 7 (28%)         | 13 (24%)         | 33 (6%)          |
|                                          |                 | 5 (9%)          | 8 (21%)         | 14 (11%)         | 34 (7%)          |
|                                          |                 |                 | 9 (16%)         | 15 (8%)          | 35 (9%)          |
|                                          |                 |                 |                 | 16 (7%)          | 36 (7%)          |
|                                          |                 |                 |                 | 17 (2%)          | 37 (4%)          |
|                                          |                 |                 |                 |                  | 38 (3%)          |
|                                          |                 |                 |                 |                  | 39 (1%)          |
| $\bar{n}$                                | 1.26            | 3.08            | 6.76            | 12.36            | 31.61            |
| $s_1$                                    | 0.54            | 0.86            | 1.70            | 2.09             | 3.26             |
| $\bar{n} \pm t \cdot s_1$                | $1.26 \pm 1.06$ | $3.08 \pm 1.69$ | $6.76 \pm 3.33$ | $12.36 \pm 3.05$ | $31.61 \pm 6.39$ |
| $\bar{OD}$                               | 1.97            | 3.80            | 6.90            | 13.8             | 35.2             |
| $s_2$                                    | 0.40            | 0.63            | 0.98            | 5.2              | 8.5              |
| $\bar{OD} \pm t \cdot s_2$               | $1.97 \pm 0.78$ | $3.80 \pm 1.23$ | $6.90 \pm 1.92$ | $13.8 \pm 10.2$  | $35.2 \pm 16.7$  |

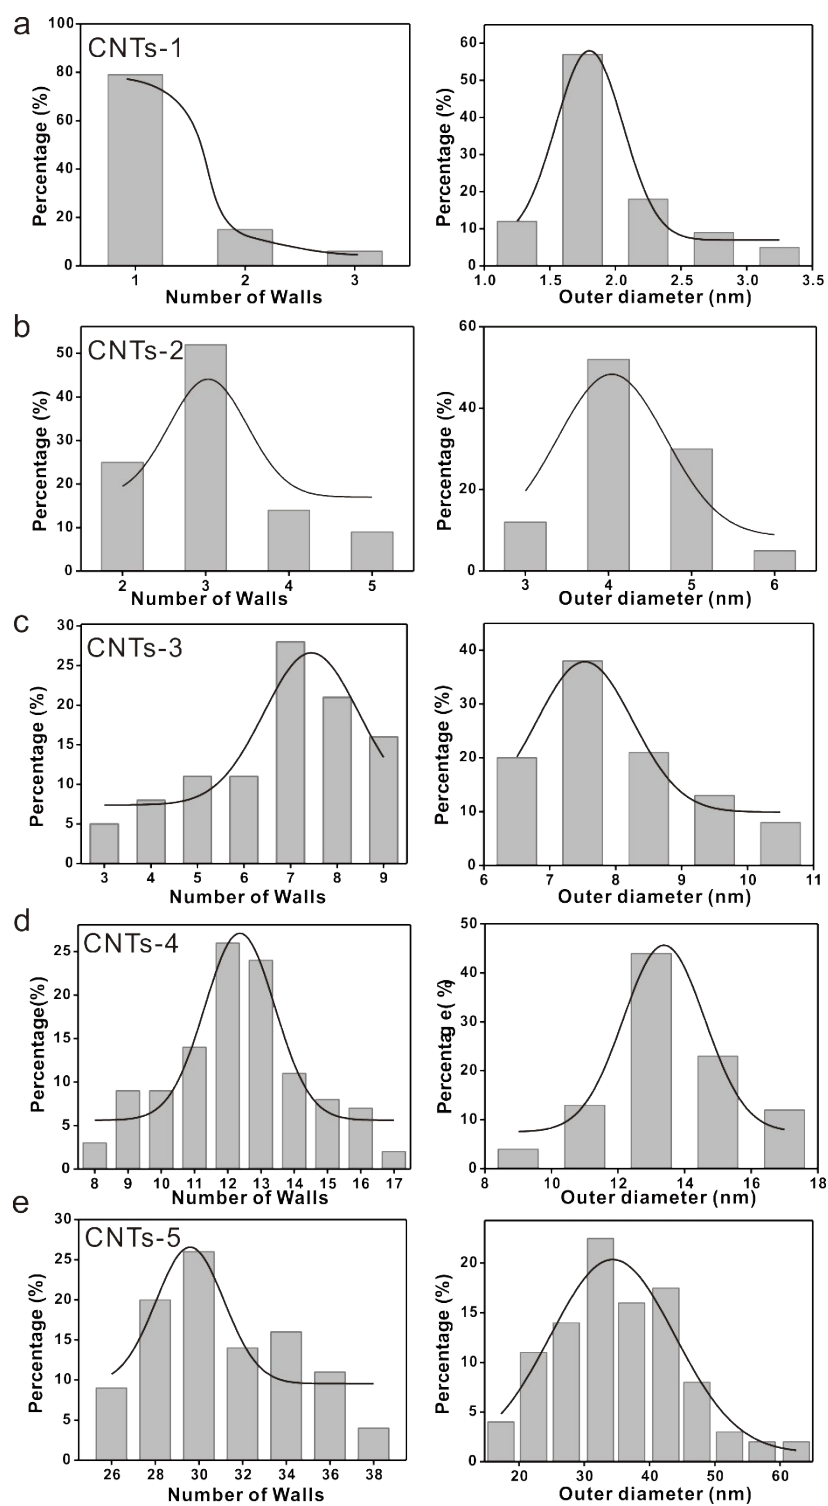

**Figure S1** The distributions of the number of walls ( $\bar{n}$ ) and outer diameter ( $\sigma_D$ ) of each CNTs category, (a) CNTs-1, (b) CNTs-2, (c) CNTs-3, (d) CNTs-4, (e) CNTs-5.

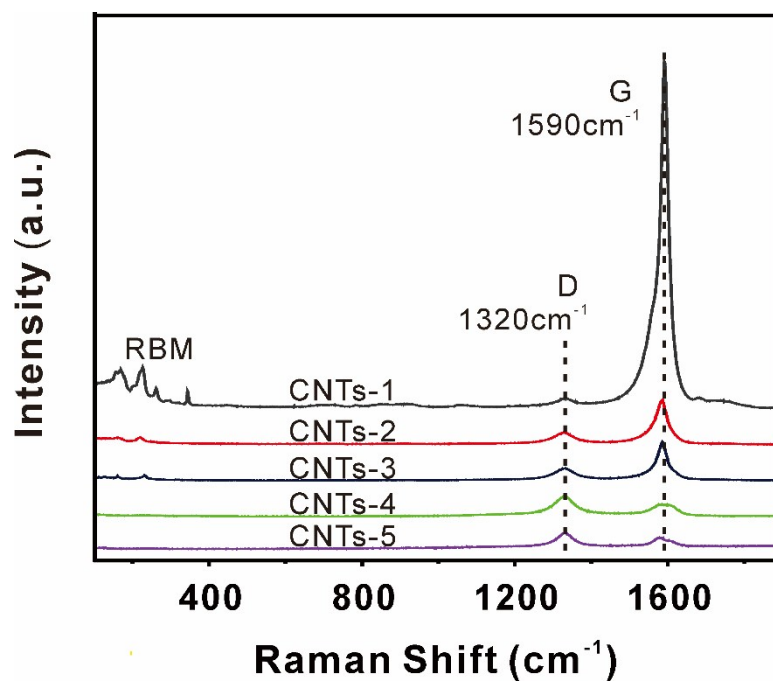

**Figure S2** The Raman spectra of the CNTs samples.

To avoid the contamination of the samples, we carefully deposited the CNT samples on clean Au-coated silicon wafers.

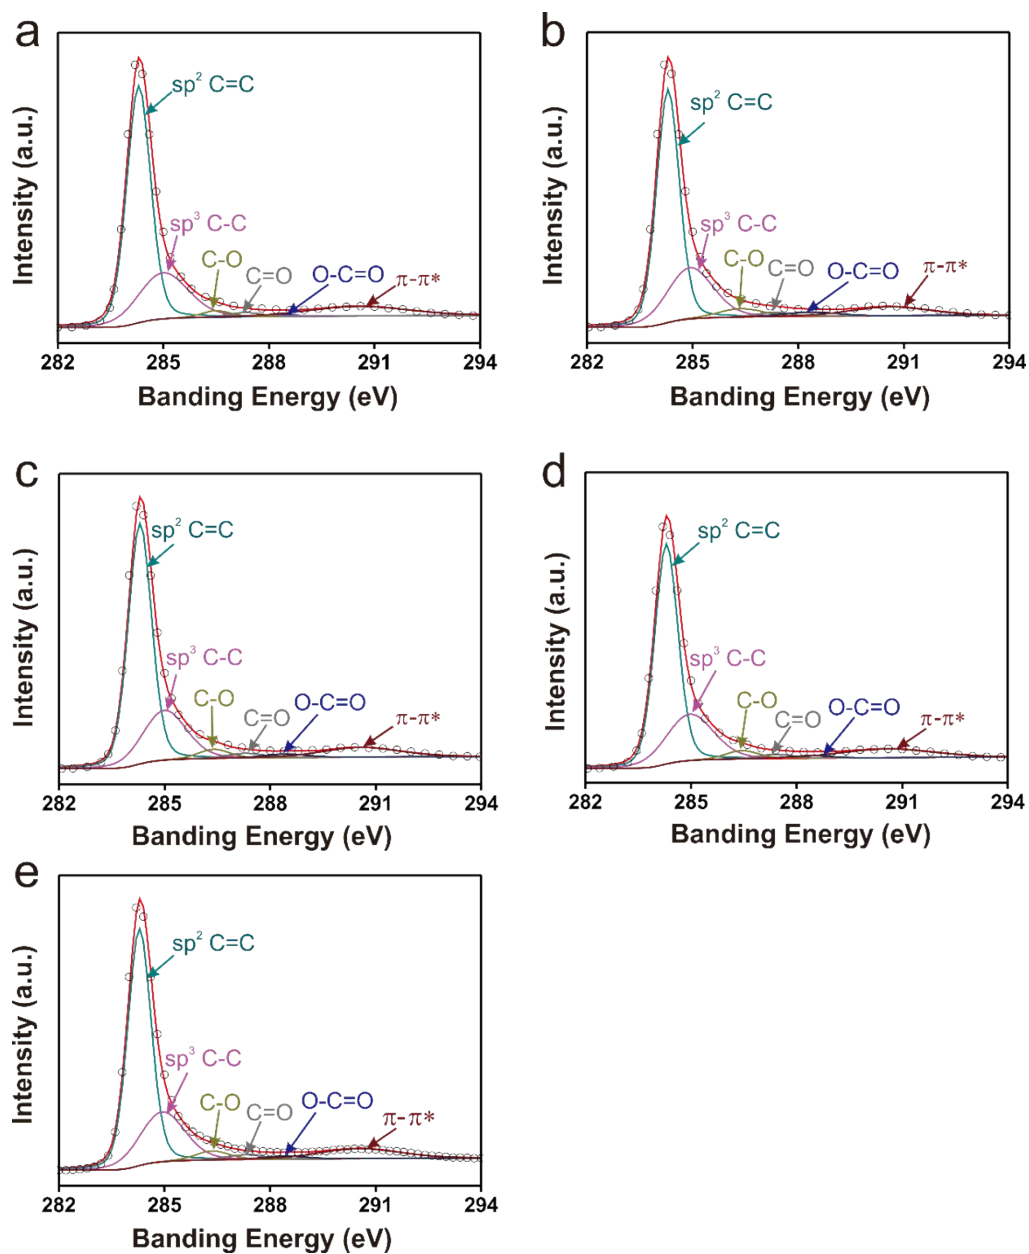

**Figure S3** C1s core level XPS of (a) CNTs-1, (b) CNTs-2, (c) CNTs-3, (d)CNTs-4, (e) CNTs-5

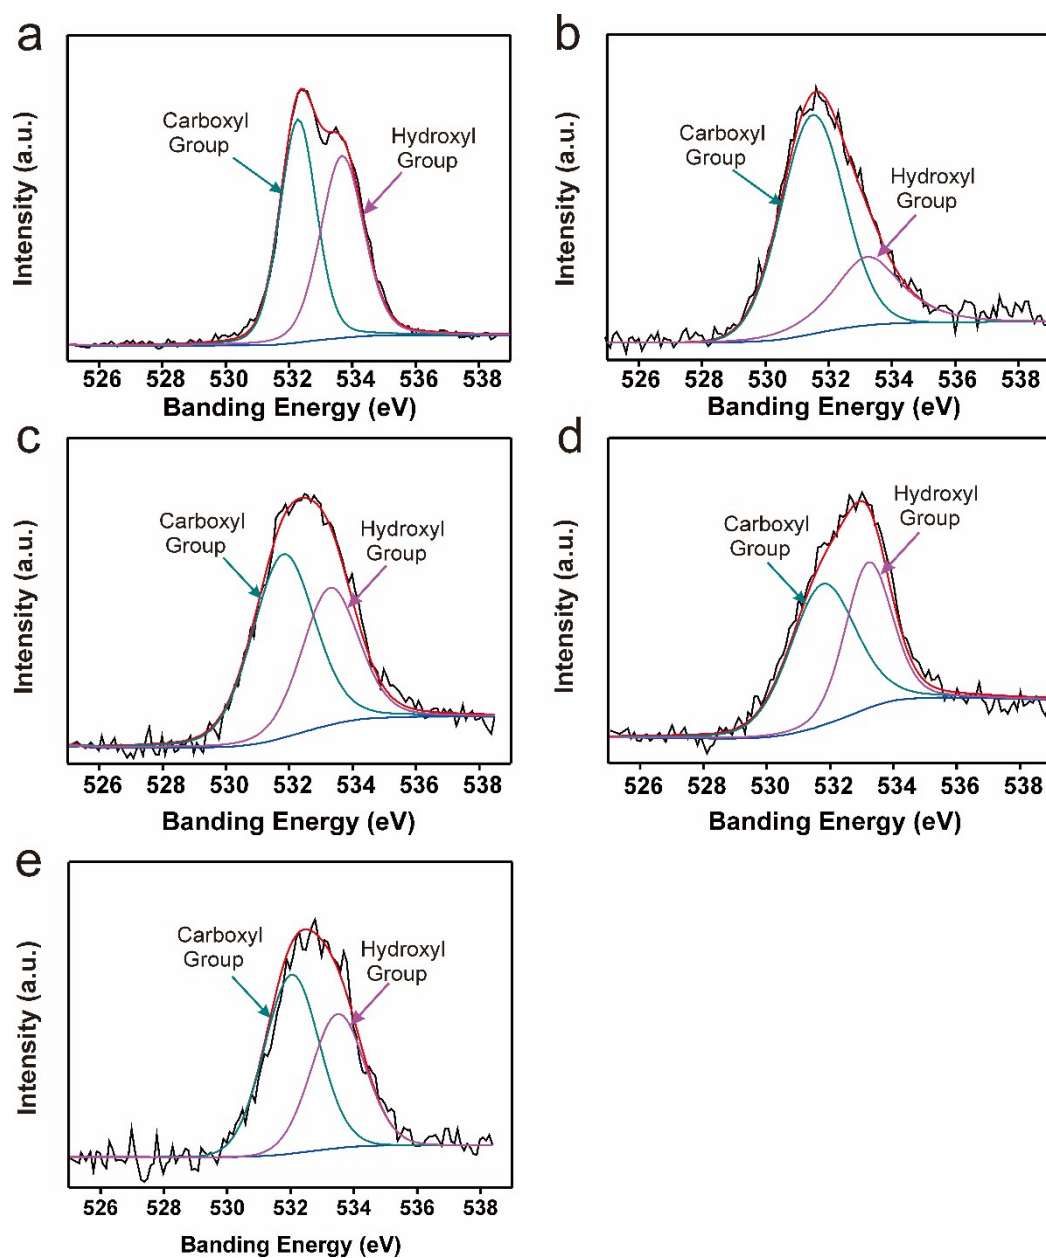

**Figure S4** O1s core level XPS of (a) CNTs-1, (b) CNTs-2, (c) CNTs-3, (d) CNTs-4, (e) CNTs-5.

**Table S3** The content (at. %) of carboxyl group obtained from the high resolution O1s spectrum.

| Catalysts             | CNTs-1 | CNTs-2 | CNTs-3 | CNTs-4 | CNTs-5 |
|-----------------------|--------|--------|--------|--------|--------|
| Carboxyl Group (at.%) | 51.01  | 61.19  | 59.63  | 57.71  | 58.83  |

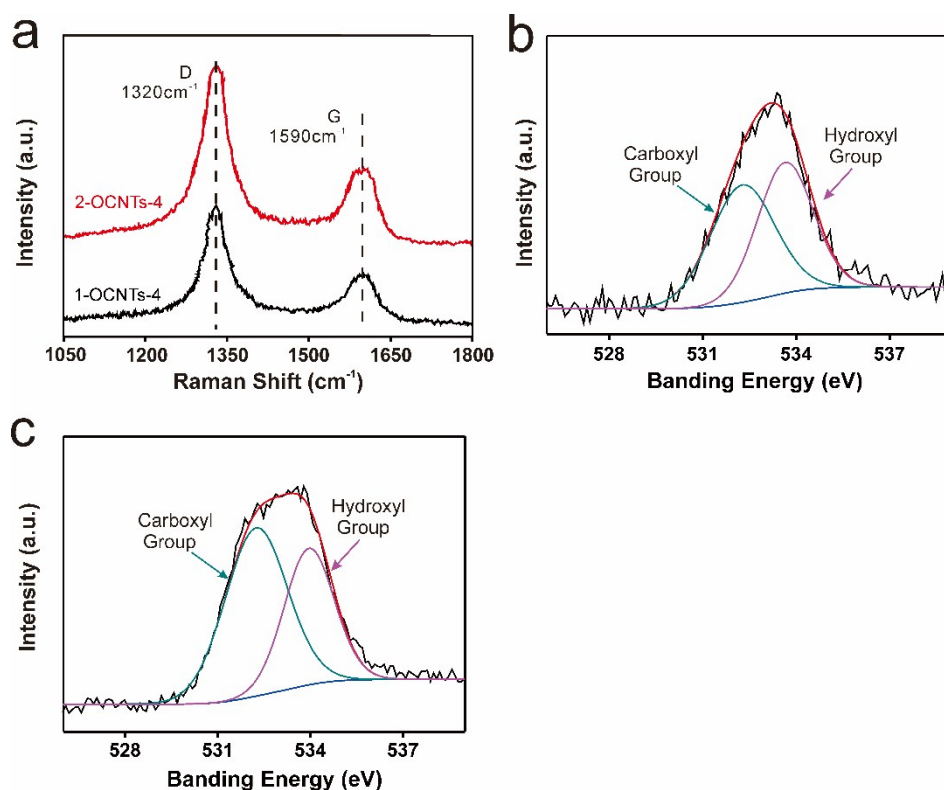

**Fig. S5** (a) The Raman spectra of oxidized CNTs samples and the high resolution O1s XPS spectrum of (b) 1-OCNTs-4 and (c) 2-OCNTs-4, respectively.

**Table S4** The value of  $I_D/I_G$ , the content (at. %) of carboxyl group of 1-OCNTs and 2-OCNTs-4.

| CNTs      | $I_D/I_G$ | Carboxyl Groups (at. %) |
|-----------|-----------|-------------------------|
| CNTs-4    | 2.50      | 57.71                   |
| 1-OCNTs-4 | 2.62      | 58.97                   |
| 2-OCNTs-4 | 2.83      | 64.56                   |

**Table S5** The peak potential and peak current density value,  $\Delta E_p$ ,  $|I_{pa}/I_{pc}|$  and  $R_{ct}$  of CNTs-4, 1-OCNTs-4 and 2-OCNTs-4 for the  $VO_2^+/VO^{2+}$  redox reaction.

| Sample    | $E_1(V)$ | $I_{pa}(mA\ mg^{-1})$ | $E_2(V)$ | $I_{pc}(mA\ mg^{-1})$ | $\Delta E_p$ | $ I_{pa}/I_{pc} $ | $R_{ct}(\Omega)$ |
|-----------|----------|-----------------------|----------|-----------------------|--------------|-------------------|------------------|
| CNTs-4    | 0.929    | 38.5                  | 0.753    | -27.4                 | 0.176        | 1.40              | 74.9             |
| 1-OCNTs-4 | 0.938    | 41.8                  | 0.740    | -27.7                 | 0.198        | 1.51              | 95.6             |
| 2-OCNTs-4 | 0.942    | 45.4                  | 0.733    | -28.1                 | 0.209        | 1.62              | 137.1            |

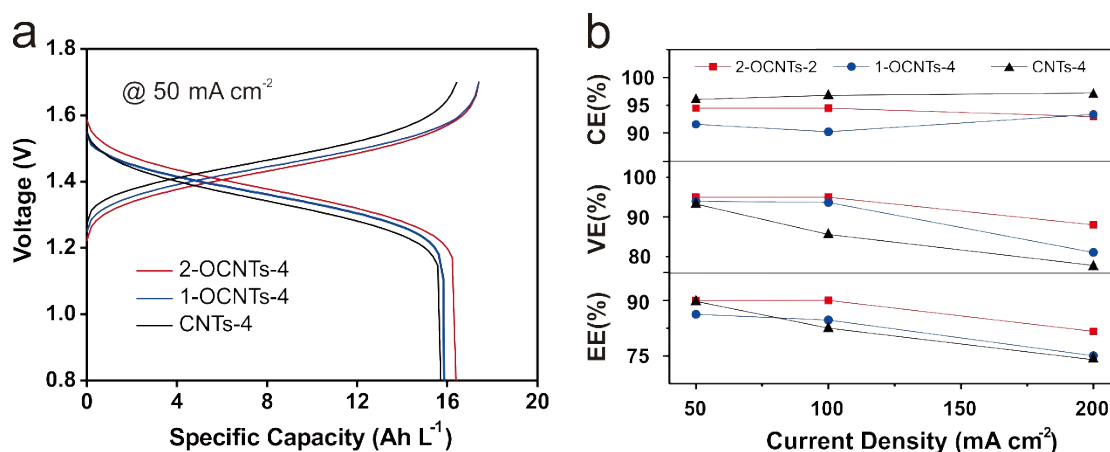

**Fig. S6** (a) The charge/discharge voltage profiles of VRFB cells based on CNTs at a current density of 50 mA cm<sup>-2</sup>; (b) Coulombic efficiency (CE), voltage efficiency (VE) and energy efficiency (EE) of VRFB cells based on oxidized CNTs-4 and CNTs at various current densities.

Three vanadium redox flow batteries were assembled and tested in a self-made device. The active area was 4 cm<sup>2</sup> of the single cell including a Nafion 212 membrane, a negative electrode and a positive electrode. The negative electrode was XC-72 modified carbon felt for all the three cells. The positive electrode was CNTs-4, 1-OCNTs-4 and 2-OCNTs-4 modified carbon felt for different cells. The loading of carbon materials on the carbon felt was 2 mg cm<sup>-2</sup>. The positive and negative electrolytes were 1.5 mol L<sup>-1</sup> VO<sup>2+</sup> + 3.0 mol L<sup>-1</sup> H<sub>2</sub>SO<sub>4</sub> and 1.5 mol L<sup>-1</sup> V<sup>3+</sup> + 3.0 mol L<sup>-1</sup> H<sub>2</sub>SO<sub>4</sub> solutions, respectively. The flow rate was 40 mL min<sup>-1</sup> fed by peristaltic pumps. The cut-off voltage was between 1.7 V and 0.8 V for the charge and discharge tests.
